# Supplementary material
Source: PubMed Central journal article supplement (PMC5437976)
Supplement: NIHMS861387-supplement-1.pdf [file NIHMS861387-supplement-1.pdf]

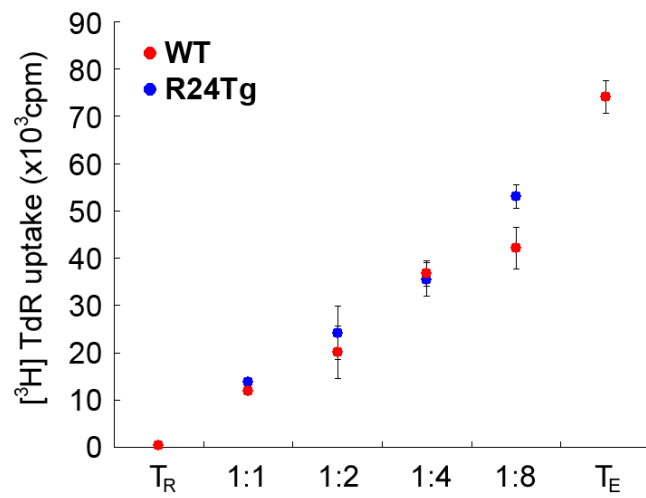

**Fig S1. Excessive miR-24 expression did not alter Treg cell suppressor function in vitro.** Treg cells (Tr) isolated from R24Tg mice or WT control littermates were subjected to in vitro suppression analysis at indicated ratios of responder T cells (Te). Data are representative of three independent experiments (n=6).

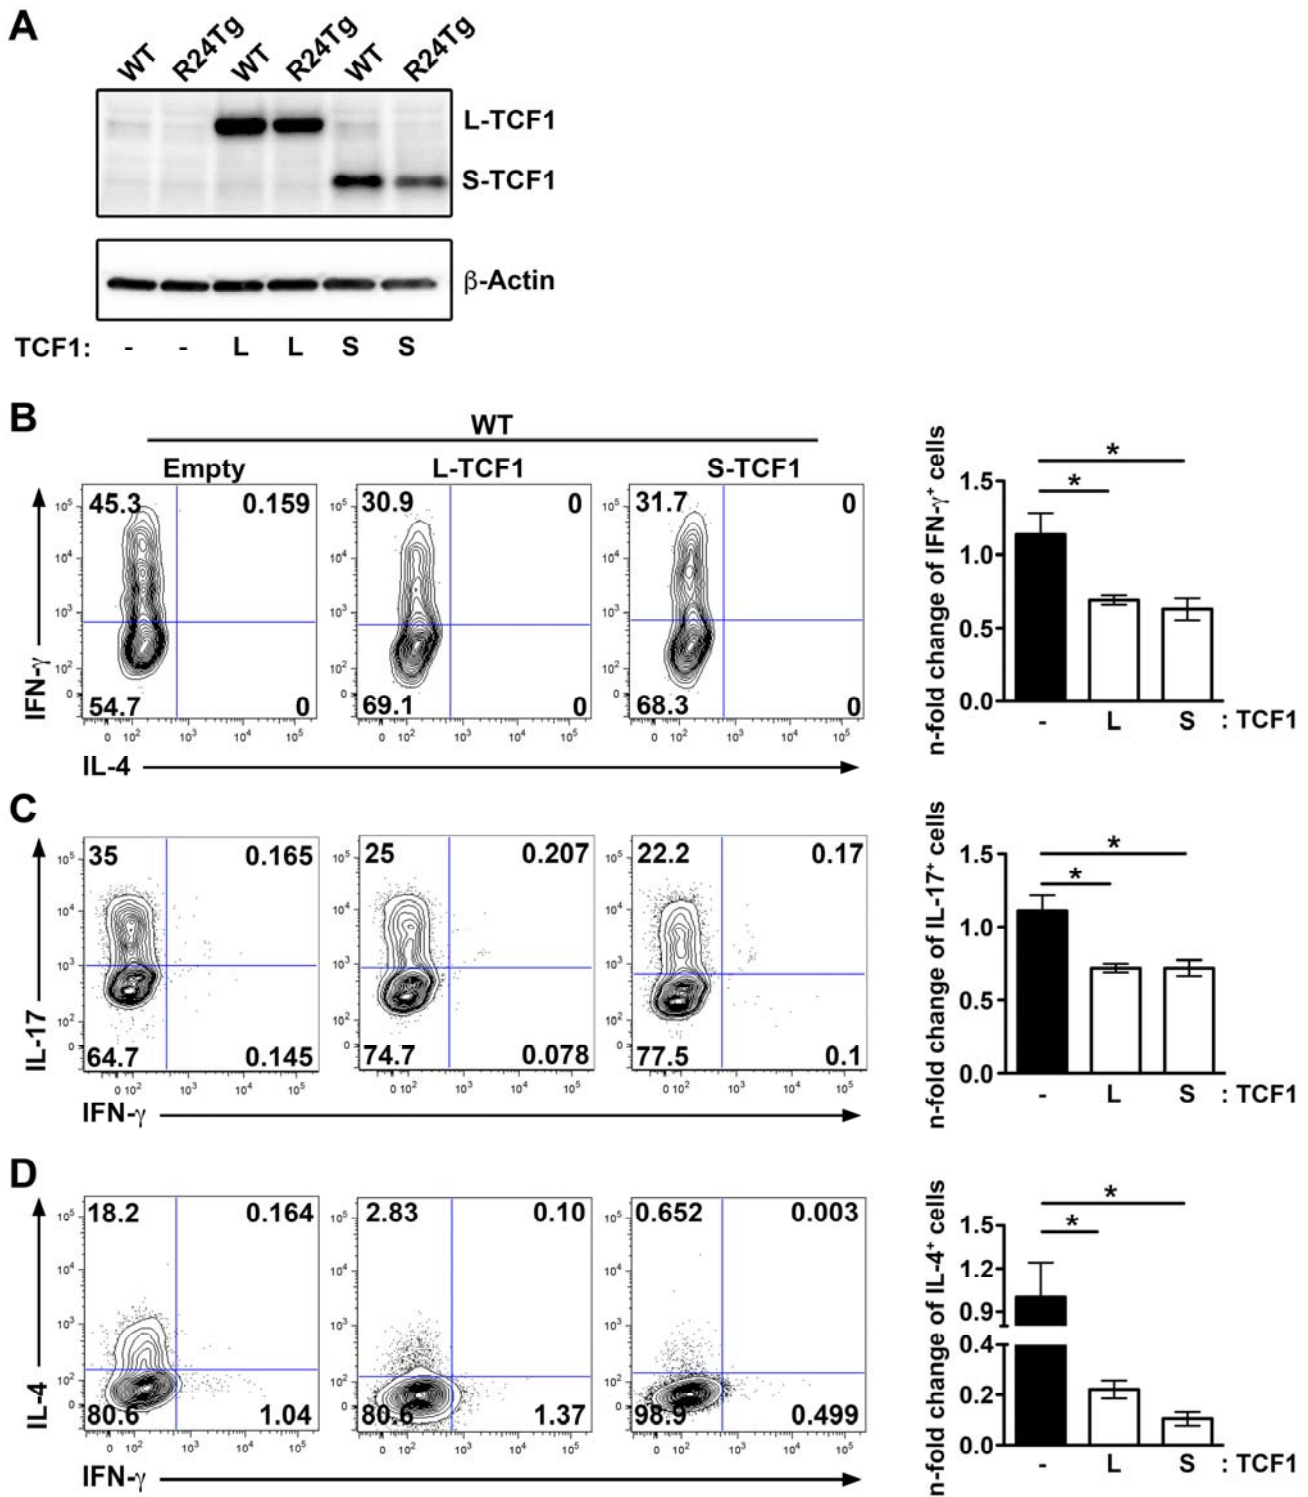

**Fig S2. Retrovirally overexpressing different TCF isoforms in R24Tg or WT T cells. (A)** Immunoblot analysis of TCF1 expression in R24Tg T cells after retroviral transduction of empty vector or vectors expressing either long (L-TCF1) or short TCF1 (S-TCF1) isoforms. FACS analysis of the production of **(B)** IFN $\gamma$ , **(C)** IL-17 or **(D)** IL-4 in GFP<sup>+</sup> WT CD4<sup>+</sup> T cells transduced with control vector or vectors expressing different TCF1 isoforms with a GFP reporter under Th1-, Th17- or Th2 polarizing conditions. n-fold changes (on the basis of empty vector controls) of IFN $\gamma$ <sup>+</sup>, IL-17<sup>+</sup> or IL-4<sup>+</sup> cell frequencies in GFP<sup>+</sup> WT CD4<sup>+</sup> T cells were shown on the right panel. Data represent mean  $\pm$  SD and FACS plots are representative of three independent experiments. \*p<0.05.
